# Supplementary material for: Parameterization of the Durations of Phases of Foot-And-Mouth Disease in Cattle
Source: PubMed Central journal article supplement (PMC6696987; doi:10.3389/fvets.2019.00263), 2019-08-09
Supplement: Table_1.pdf [file Table_1.pdf]

## *Supplementary Material*

### **Parameterization of the Durations of Phases of Foot-And-Mouth Disease in Cattle**

Shankar Yadav<sup>1,2,3</sup>, Carolina Stenfeldt<sup>1,4</sup>, Matt A. Branam<sup>2</sup>, Karla I. Moreno-Torres<sup>1,2,3</sup>, Lindsey Holmstrom<sup>2</sup>, Amy H. Delgado<sup>2</sup>, Jonathan Arzt<sup>1\*</sup>

<sup>1</sup> Foreign Animal Disease Research Unit, Plum Island Animal Disease Center, Agricultural Research Service, United States Department of Agriculture, Greenport, NY, USA

<sup>2</sup> Monitoring and Modeling, Center for Epidemiology and Animal Health, Animal and Plant Health Inspection Service, United States Department of Agriculture, Fort Collins, CO, USA

<sup>3</sup> PIADC Research Participation Program, Oak Ridge Institute for Science and Education, Oak Ridge, TN, USA

<sup>4</sup> Department of Veterinary Population Biology, University of Minnesota, St. Paul, MN, USA

\*Corresponding author: [Jonathan.Arzt@ARS.USDA.GOV](mailto:Jonathan.Arzt@ARS.USDA.GOV)

Supplementary Table S1: Details of the experiments included in this study, conducted at the USDA ARS Plum Island Animal Disease Center during 2011-2016 to accomplish various objectives related to the pathogenesis of the foot-and-mouth disease in cattle.

| Studies                  | Virus strains | Exposure routes                  | Number of cattle | Inoculation dose       | Contact challenge time points |
|--------------------------|---------------|----------------------------------|------------------|------------------------|-------------------------------|
| (Pacheco et al., 2016b)  | O/SKR/2010    | Intra-dermal lingual inoculation | 2                | 10 <sup>5.3</sup> PFU  | NA                            |
|                          |               | Cattle to cattle contact         | 4                | NA                     | 24 hpi*                       |
|                          |               | Pig to cattle contact            | 4                |                        | 48 hpi                        |
| (Pacheco et al., 2016a)  | A24 Cruzeiro  | Pig to cattle contact            | 8                | NA                     | 48 hpi                        |
|                          |               | Intradermal lingual inoculation  | 2                | 10 <sup>4</sup> TCID50 | NA                            |
|                          |               | Intra-nasopharyngeal inoculation | 5                | 10 <sup>5</sup> BTID50 |                               |
|                          |               |                                  | 2                | 10 <sup>7</sup> TCID50 |                               |
| Cattle to cattle contact | 2             | NA                               |                  |                        |                               |

|                           |                       |                                  |    |                        |        |
|---------------------------|-----------------------|----------------------------------|----|------------------------|--------|
|                           | Asia1 Shamir          | Intra-dermal lingual inoculation | 2  | 10 <sup>4</sup> TCID50 | NA     |
|                           |                       | Intra-nasopharyngeal inoculation | 2  | 10 <sup>6</sup> BTID50 |        |
|                           |                       |                                  | 2  | 10 <sup>7</sup> BTID50 |        |
|                           |                       | Cattle to cattle contact         | 2  | NA                     | 24 hpi |
|                           | Pig to cattle contact | 4                                | NA | 48 hpi                 |        |
|                           | O1 Manisa             | Intra-nasopharyngeal inoculation | 3  | 10 <sup>6</sup> BTID50 |        |
| Pig to cattle contact     |                       | 4                                | NA | 48 hpi                 |        |
| (Stenfeldt et al., 2016)  | A24 Cruzeiro          | Intra-nasopharyngeal inoculation | 20 | 10 <sup>5</sup> BTID50 | NA     |
|                           |                       |                                  | 2  | 10 <sup>6</sup> BTID50 |        |
| (Stenfeldt et al., 2015)  | A24 Cruzeiro          | Intra-nasopharyngeal inoculation | 10 | 10 <sup>5</sup> BTID50 | NA     |
| (Stenfeldt et al., 2018b) | A24 Cruzeiro          | Pig to cattle contact            | 10 | NA                     | 48 hpi |
| (Stenfeldt et al., 2018a) | O1Campos              | Aerosol inoculation              | 8  | 10 <sup>7</sup> PFU    |        |
| (Pacheco et al., 2013)    | O1Campos              | Aerosol inoculation              | 3  | 10 <sup>7</sup> PFU    |        |

\*hpi – hour post inoculation

Supplementary Table S2: Descriptive statistics for the incubation phase, latent phase, subclinical infectious phase, clinical infectious phase and total infectious phase duration due to FMD virus strains and serotypes from non-censored cattle. n is the number of cattle in each of the category.

| Serotypes               | Strains      | Threshold-defined approach |                                                                   | Non-threshold approach |                                                                    |
|-------------------------|--------------|----------------------------|-------------------------------------------------------------------|------------------------|--------------------------------------------------------------------|
|                         |              | n                          | Mean, median<br>25 <sup>th</sup> ,75 <sup>th</sup><br>percentile) | n                      | Mean, median<br>(25 <sup>th</sup> ,75 <sup>th</sup><br>percentile) |
| <b>Incubation phase</b> |              |                            |                                                                   |                        |                                                                    |
| Pan-serotype            | All          | 88                         | 3.5, 3 (3, 4)                                                     | 89                     | 3.6, 3 (3, 4)                                                      |
| O                       | All          | 22                         | 3, 3 (2, 3)                                                       | 22                     | 3, 3 (2, 3)                                                        |
|                         | O/SKR/2010   | 10                         | 3, 3 (2, 3)                                                       | 10                     | 3, 3 (2, 3)                                                        |
|                         | O1Manisa     | 5                          | 2.6, 2 (2, 2)                                                     | 5                      | 2.6, 2 (2, 2)                                                      |
|                         | O1Campos     | 7                          | 3.3, 3 (3, 3.5)                                                   | 7                      | 3.3, 3 (3, 3.5)                                                    |
| Asia1                   | Asia1 Shamir | 12                         | 3.2, 3 (2, 4)                                                     | 12                     | 3.2, 3 (2, 4)                                                      |
| A                       | A24 Cruzeiro | 54                         | 3.8, 4 (3, 4.8)                                                   | 55                     | 3.9, 3.8 (3, 4)                                                    |
| <b>Latent phase</b>     |              |                            |                                                                   |                        |                                                                    |

|                                     |              |    |                    |     |                     |
|-------------------------------------|--------------|----|--------------------|-----|---------------------|
| Pan-serotype                        | All          | 99 | 1.2, 1 (1, 1)      | 101 | 1.1, 1 (1, 1)       |
| O                                   | All          | 26 | 1.4, 1 (1, 2)      | 28  | 1.1, 1 (1, 1)       |
|                                     | O/SKR/2010   | 10 | 1.4, 1 (1, 1)      | 10  | 1.6, 2 (1, 2)       |
|                                     | O1Manisa     | 7  | 1.6, 2 (1, 2)      | 7   | 1.6, 2 (1, 2)       |
|                                     | O1Campos     | 9  | 1, 1 (1, 1)        | 11  | 1.1, 1 (1, 1)       |
| Asia1                               | Asia1 Shamir | 12 | 1.3, 1 (1, 2)      | 12  | 1.2, 1 (1, 1)       |
| A                                   | A24 Cruzeiro | 61 | 1, 1 (1, 1)        | 61  | 1.1, 1 (1, 1)       |
| <b>Subclinical infectious phase</b> |              |    |                    |     |                     |
| Pan-serotype                        | All          | 90 | 2.4, 2 (1, 3)      | 91  | 2.5, 2 (1.5, 3)     |
| O                                   | All          | 22 | 1.7, 2 (1, 2)      | 23  | 1.9, 2 (1, 2)       |
|                                     | O/SKR/2010   | 10 | 1.6, 1 (1, 2)      | 10  | 2.1, 2 (1, 2)       |
|                                     | O1Manisa     | 5  | 1, 1 (0, 1)        | 6   | 1.2, 1 (0.3, 1.8)   |
|                                     | O1Campos     | 7  | 2.3, 2 (2, 2.5)    | 7   | 2.3, 2 (2, 2.5)     |
| Asia1                               | Asia1 Shamir | 12 | 1.8, 2 (1, 2.3)    | 12  | 2, 2 (1, 3)         |
| A                                   | A24 Cruzeiro | 56 | 2.8, 3 (2, 3.3)    | 56  | 2.8, 3 (2, 4)       |
| <b>Clinical infectious phase</b>    |              |    |                    |     |                     |
| Pan-serotype                        | All          | 42 | 7.1, 7 (5.3, 9)    | 40  | 8.6, 9 (6, 11)      |
| O                                   | All          | 14 | 6.6, 7 (4.3, 9)    | 13  | 8.5, 8 (6, 10)      |
|                                     | O/SKR/2010   | 9  | 5.8, 5 (4, 9)      | 8   | 8.3, 7 (5.8, 9.8)   |
|                                     | O1Manisa     | 2  | 7, 7 (7, 7)        | 2   | 6.5, 6.5 (6.3, 6.8) |
|                                     | O1Campos     | 3  | 9, 10 (8.5, 10)    | 3   | 10.3, 10 (10,       |
| Asia1                               | Asia1 Shamir | 4  | 5.8, 6.5 (5.3, 7)  | 3   | 6, 6 (5.5, 6.5)     |
| A                                   | A24 Cruzeiro | 24 | 7.5, 7 (6, 9.3)    | 24  | 9.4, 9.5 (6.8, 13)  |
| <b>Total infectious phase</b>       |              |    |                    |     |                     |
| Pan-serotype                        | All          | 43 | 9.2, 9 (7, 12)     | 41  | 11.1, 11 (8, 13)    |
| O                                   | All          | 14 | 7.9, 7 (5.3, 10.5) | 13  | 10.2, 11 (7, 13)    |
|                                     | O/SKR/2010   | 9  | 6.9, 6 (5, 9)      | 8   | 10, 9.5 (6.8, 11.8) |
|                                     | O1Manisa     | 2  | 7, 7 (7, 7)        | 2   | 6.5, 6.5 (6.8,      |
|                                     | O1Campos     | 3  | 11.7, 13 (11, 13)  | 3   | 13, 13 (13, 13)     |
| Asia1                               | Asia1 Shamir | 4  | 7.8, 8.5 (7.3, 9)  | 3   | 8.3, 9 (8, 9)       |
| A                                   | A24 Cruzeiro | 25 | 10.2, 9 (8, 13)    | 25  | 12, 13 (9, 16)      |

Supplementary Table S3: Descriptive statistics for the incubation phase, latent phase, subclinical infectious phase, clinical infectious phase and total infectious phase durations due to exposure methods from non-censored cattle. n is the number of cattle in each of the category.

| Exposure methods                    | Threshold-defined approach |                                                              | Non-threshold approach |                                                               |
|-------------------------------------|----------------------------|--------------------------------------------------------------|------------------------|---------------------------------------------------------------|
|                                     | n                          | Mean, median 25 <sup>th</sup> , 75 <sup>th</sup> percentile) | n                      | Mean, median (25 <sup>th</sup> , 75 <sup>th</sup> percentile) |
| <b>Incubation phase</b>             |                            |                                                              |                        |                                                               |
| All                                 | 88                         | 3.5, 3 (3, 4)                                                | 89                     | 3.6, 3 (3, 4)                                                 |
| Cattle to cattle contact            | 8                          | 4.5, 5 (2.7, 6)                                              | 8                      | 4.5, 5 (2.7, 6)                                               |
| Pig to cattle contact               | 29                         | 3.4, 3 (2, 4)                                                | 29                     | 3.4, 3 (2, 4)                                                 |
| Intra-dermal lingual inoculation    | 6                          | 1.5, 1.5 (1, 2)                                              | 6                      | 1.5, 1.5 (1, 2)                                               |
| Simulated natural inoculation       | 45                         | 3.6, 3 (3, 4)                                                | 46                     | 3.7, 3.5 (3, 4)                                               |
| <b>Latent phase</b>                 |                            |                                                              |                        |                                                               |
| All                                 | 99                         | 1.2, 1 (1, 1)                                                | 101                    | 1.1, 1 (1, 1)                                                 |
| Cattle to cattle contact            | 8                          | 1.5, 1.5 (1, 2)                                              | 8                      | 1.5, 1.5 (1, 2)                                               |
| Pig to cattle contact               | 30                         | 1, 1 (1, 1)                                                  | 30                     | 1.1, 1 (1, 1)                                                 |
| Intra-dermal lingual inoculation    | 6                          | 1.2, 1 (1, 1)                                                | 6                      | 1, 1 (1, 1)                                                   |
| Simulated natural inoculation       | 55                         | 1.1, 1(1, 1)                                                 | 57                     | 1.1, 1 (1, 1)                                                 |
| <b>Subclinical infectious phase</b> |                            |                                                              |                        |                                                               |
| All                                 | 90                         | 2.4, 2 (1, 3)                                                | 91                     | 2.5, 2 (1.5, 3)                                               |
| Cattle to cattle contact            | 8                          | 3, 3 (1.7, 4)                                                | 8                      | 3, 3 (1.7, 4)                                                 |
| Pig to cattle contact               | 30                         | 2.3, 2 (1, 3)                                                | 30                     | 2.4, 2.5 (1, 3)                                               |
| Intra-dermal lingual inoculation    | 6                          | 0.3, 0 (0, 0)                                                | 6                      | 0.7, 1 (0.25, 1)                                              |
| Simulated natural inoculation       | 46                         | 2.6, 2.5 (2, 3)                                              | 47                     | 2.6, 2 (2, 3)                                                 |
| <b>Clinical infectious phase</b>    |                            |                                                              |                        |                                                               |
| All                                 | 42                         | 7.1, 7 (5.3, 9)                                              | 40                     | 8.6, 9 (6, 11)                                                |
| Cattle to cattle contact            | 3                          | 4.3, 5 (4, 5)                                                | 3                      | 5, 5 (4.5, 5.5)                                               |
| Pig to cattle contact               | 12                         | 7.1, 7 (6, 9)                                                | 12                     | 8.6, 8 (7, 9.2)                                               |
| Intra-dermal lingual inoculation    | 3                          | 5, 4 (4, 5.5)                                                | 1                      | 6                                                             |
| Simulated natural inoculation       | 24                         | 7.6, 7 (6, 10)                                               | 24                     | 9.5, 10 (6, 13)                                               |
| <b>Total infectious phase</b>       |                            |                                                              |                        |                                                               |
| All                                 | 43                         | 9.2, 9 (7, 12)                                               | 41                     | 11.1, 11 (8, 13)                                              |

|                                  |    |                   |    |                  |
|----------------------------------|----|-------------------|----|------------------|
| Cattle to cattle contact         | 3  | 5.6, 6 (5, 6.5)   | 3  | 6.3, 6 (5.5, 7)  |
| Pig to cattle contact            | 13 | 8.5, 8 (7, 9)     | 13 | 10.2, 9 (8, 11)  |
| Intra-dermal lingual inoculation | 3  | 5.6, 5 (4.5, 6.5) | 1  | 7                |
| Simulated natural inoculation    | 24 | 10.4, 9.5 (8, 13) | 24 | 12.4, 13 (9, 16) |

Supplementary Table S4. The distribution fit for the FMD phase durations obtained from the animal-level data and best-fit AFT model data for threshold-defined approach. The animal-level data are from the non-censored animals only.

| Serotypes                          | Animal-level data  |                    | Model-predicted data |                    |
|------------------------------------|--------------------|--------------------|----------------------|--------------------|
|                                    | Continuous         | Discrete           | Continuous           | Discrete           |
| 1. Incubation period               |                    |                    |                      |                    |
| Pan-serotype                       | Weibull(2.3,3.2)   | **Binomial(8,0.4)  | Logistic(4.1,0.4)    | Binomial(6,0.7)    |
| O                                  | Lognormal(3.3,1.2) | Binomial(9,0.3)    | Logistic(3.5,0.4)    | **Binomial(5,0.73) |
| Asia1                              | Normal(3.2,1.1)    | **Binomial(5,0.6)  | Logistic(3.4,0.5)    | **Binomial(5,0.7)  |
| A                                  | Normal(3.8,1.4)    | **Binomial(7,0.5)  | Logistic(4.4,0.2)    | Binomial(6,0.77)   |
| 2. Latent duration                 |                    |                    |                      |                    |
| Pan-serotype                       | Pert(1,1,3.5)      | Binomial(3,0.4)    | Pert(1.2,1.2,2.4)    | Binomial(2,0.7)    |
| O                                  | Logistic(1.2,0.3)  | Binomial(3,0.5)    | Pert(1.4,1.5,2.4)    | Binomial(2, 0.96)  |
| Asia1                              | Normal(1.3,0.5)    | **Binomial(2, 0.7) | Normal(1.4, 0.2)     | Binomial(2, 0.8)   |
| A                                  | Pert(1,1,3.3)      | Binomial(3,0.4)    | Pert(1.2,1.2,1.7)    | Binomial(2, 0.5)   |
| 3. Subclinical infectious duration |                    |                    |                      |                    |
| Pan-serotype                       | Weibull(2,3.2)     | **Poisson(2.4)     | Weibull(6.8,4.6)     | Binomial(5,0.6)    |
| O                                  | Logistic(1.6,0.7)  | **Poisson(1.7)     | Logistic(2.4,0.25)   | Binomial(3,0.7)    |
| Asia1                              | **Normal(1.8,0.9)  | Binomial(3,0.6)    | Logistic(2,0.3)      | Binomial(3,0.66)   |
| A                                  | Logistic(2.7,0.8)  | **Poisson(2.8)     | Logistic(3.4,0.16)   | Binomial(5,0.7)    |
| 4. Clinical infectious duration    |                    |                    |                      |                    |
| Pan-serotype                       | Pert(2.4,6.2,15.1) | **Poisson(7.07)    | Pert(3.7,9.7,10)     | Binomial(10,0.86)  |
| O                                  | **Normal(6.6,2.5)  | **Poisson(6.6)     | Pert(2.7,8.9,9)      | Binomial(9,0.9)    |
| *Asia1                             | Constant(5.8)      | Constant(5.8)      | Pert(3.2,9.9,10)     | Binomial(10,0.86)  |
| A                                  | Pert(3.6,6.3,16.4) | **Poisson(7.5)     | Normal(9.1,0.6)      | Binomial(10,0.9)   |
| 5. Total infectious duration       |                    |                    |                      |                    |
| Pan-serotype                       | Pert(3.1,8.2,19)   | **Poisson(9.2)     | Normal(11.4,1.1)     | Binomial(13,0.9)   |
| O                                  | Pert(4,4,26.3)     | **Poisson(7.9)     | Pert(6.8,10.7,10.7)  | **Binomial(11,0.9) |
| *Asia1                             | Constant(7.8)      | Constant(7.8)      | Pert(6.4,11.9,12)    | **Binomial(12,0.9) |
| A                                  | Pert(7,7,25.6)     | Poisson(10.16)     | Pert(9.2,12.5,12.5)  | Binomial(13,0.96)  |

\* The data were not sufficient in number to derive a distribution. Constant distribution represents the mean durations for the respective virus serotypes.

\*\*Anderson-Darling or Chi Square test showed a good fit ( $p>0.05$ ).

Supplementary Table S5. The distribution fit for the FMD phase durations obtained from the animal-level data and best-fit AFT model data for non-threshold approach to define infectiousness. The animal-level data are from the non-censored animals only.

| Serotypes                                                                                              | Animal-level data   |                    | Model-predicted data |                     |
|--------------------------------------------------------------------------------------------------------|---------------------|--------------------|----------------------|---------------------|
|                                                                                                        | Continuous          | Discrete           | Continuous           | Discrete            |
| <b>1. Incubation duration</b>                                                                          |                     |                    |                      |                     |
| The distribution fit for threshold was the same as the non-threshold defined infectiousness (Table 4). |                     |                    |                      |                     |
| <b>2. Latent duration</b>                                                                              |                     |                    |                      |                     |
| Pan-serotype                                                                                           | Pert(1,1,3.2)       | Binomial(3,0.4)    | Logistic(1.3,0.07)   | Binomial(2,0.5)     |
| O                                                                                                      | Logistic(1.05,0.14) | Binomial(2,0.57)   | Logistic(1.3,0.09)   | Binomial(2,0.6)     |
| Asia1                                                                                                  | Normal(1.3,0.5)     | Poisson(1.3)       | Logistic(1.2,0.1)    | Binomial(2,0.6)     |
| A                                                                                                      | Pert(1,1,3.3)       | Binomial(3,0.4)    | Logistic(1.3,0.04)   | Binomial (2,0.5)    |
| <b>3. Subclinical infectious duration</b>                                                              |                     |                    |                      |                     |
| Pan-serotype                                                                                           | Weibull(2.2,3.2)    | Binomial(12,0.2)   | Logistic(3.1,0.4)    | Binomial(5,0.5)     |
| O                                                                                                      | Logistic(1.8,0.6)   | Poisson(1.9)       | Logistic(2.4,0.2)    | Binomial(3,0.7)     |
| Asia1                                                                                                  | Normal(2,0.85)      | **Binomial(3,0.66) | Normal(2.6,0.9)      | Binomial(3,0.8)     |
| A                                                                                                      | Normal(2.8,1.5)     | **Poisson(2.8)     | Normal(3.4, 0.4)     | Binomial(5,0.6)     |
| <b>4. Clinical infectious duration</b>                                                                 |                     |                    |                      |                     |
| Pan-serotype                                                                                           | **Normal(8.8,3.4)   | **Poisson(8.8)     | Logistic(11.3,0.7)   | Binomial(15,0.74)   |
| O                                                                                                      | **Normal(8.5,3.3)   | **Poisson(8.5)     | Logistic(10.4,0.9)   | Binomial(15,0.68)   |
| *Asia1                                                                                                 | *Constant(6)        | *Constant(6)       | Logistic(10.7,1.1)   | Binomial(17,0.63)   |
| A                                                                                                      | **Normal(9.4,3.5)   | Poisson(9.4)       | Logistic(11.6,0.3)   | Binomial(15,0.8)    |
| <b>5. Total infectious duration</b>                                                                    |                     |                    |                      |                     |
| Pan-serotype                                                                                           | Pert(4.6,8.8,26.3)  | **Poisson(11.1)    | Logistic(13.9,0.7)   | Binomial(15,0.9)    |
| O                                                                                                      | **Normal(10.2,3.4)  | **Poisson(10.2)    | Logistic(12.9,0.6)   | Binomial(14,0.9)    |
| *Asia1                                                                                                 | *Constant(8.3)      | *Constant(8.3)     | Pert(6.8,13.8,13.8)  | **Binomial(14, 0.9) |
| A                                                                                                      | Pert(5.5,9.6,26.8)  | **Poisson(11.96)   | Logistic(14.7,0.4)   | Binomial(15,0.97)   |

\* The data were not sufficient in number to derive a distribution. Constant distribution represent the mean durations for the respective virus serotypes.

\*\*Anderson-Darling or Chi Square test showed a good fit ( $p>0.05$ ).

## References

- Pacheco, J., Stenfeldt, C., Rodriguez, L., Arzt, J., 2016a. Infection dynamics of foot-and-mouth disease virus in cattle following intranasopharyngeal inoculation or contact exposure. *Journal of comparative pathology* 155, 314-325.
- Pacheco, J.M., Gladue, D.P., Holinka, L.G., Arzt, J., Bishop, E., Smoliga, G., Pauszek, S.J., Bracht, A.J., O'Donnell, V., Fernandez-Sainz, I., Fletcher, P., Piccone, M.E., Rodriguez, L.L., Borca, M.V., 2013. A partial deletion in non-structural protein 3A can attenuate foot-and-mouth disease virus in cattle. *Virology* 446, 260-267.
- Pacheco, J.M., Lee, K.N., Eschbaumer, M., Bishop, E.A., Hartwig, E.J., Pauszek, S.J., Smoliga, G.R., Kim, S.M., Park, J.H., Ko, Y.J., Lee, H.S., Tark, D., Cho, I.S., Kim, B., Rodriguez, L.L., Arzt, J., 2016b. Evaluation of Infectivity, Virulence and Transmission of FDMV Field Strains of Serotypes O and A Isolated In 2010 from Outbreaks in the Republic of Korea. *PLoS One* 11, e0146445.
- Stenfeldt, C., Arzt, J., Pacheco, J.M., Gladue, D.P., Smoliga, G.R., Silva, E.B., Rodriguez, L.L., Borca, M.V., 2018a. A partial deletion within foot-and-mouth disease virus non-structural protein 3A causes clinical attenuation in cattle but does not prevent subclinical infection. *Virology* 516, 115-126.
- Stenfeldt, C., Eschbaumer, M., Pacheco, J.M., Rekant, S.I., Rodriguez, L.L., Arzt, J., 2015. Pathogenesis of primary foot-and-mouth disease virus infection in the nasopharynx of vaccinated and non-vaccinated cattle. *PLoS One* 10, e0143666.
- Stenfeldt, C., Eschbaumer, M., Rekant, S.I., Pacheco, J.M., Smoliga, G.R., Hartwig, E.J., Rodriguez, L.L., Arzt, J., 2016. The foot-and-mouth disease carrier state divergence in cattle. *J Virol* 90, 6344-6364.
- Stenfeldt, C., Hartwig, E., Smoliga, G., Palinski, R., Silva, E.B., Bertram, M., Fish, I.H., Pauszek, S.J., Arzt, J., 2018b. Contact Challenge of Cattle with Foot-and-Mouth Disease Virus Validates the Role of the Nasopharyngeal Epithelium as the Site of Primary and Persistent Infection. *MSphere*.
